## RETRACTION

## Retraction: The Downregulation of MiR-182 Is Associated with the Growth and Invasion of Osteosarcoma Cells through the Regulation of TIAM1 Expression

The PLOS ONE Editors

The PLOS ONE Editors retract this article [1] because it was identified as one of a series of submissions for which we have concerns about peer review, authorship, and similarities across articles. Image similarities were noted between panels in Fig 3B in [1], between Fig 4D in [1] and Fig 5D in [2, 3], between Fig 4E in [1] and Fig 3D in [4, 5], and between Fig 5B in [1], Fig 5D in [6, 7], Fig 4A in [8, 9] and Fig 7E in [10]. These concerns call into question the validity and provenance of the reported results. We regret that the issues were not addressed prior to the article's publication.

All authors either did not respond directly or could not be reached.

## References

1. Hu J, Lv G, Zhou S, Zhou Y, Nie B, Duan H, et al. (2015) The Downregulation of MiR-182 Is Associated with the Growth and Invasion of Osteosarcoma Cells through the Regulation of TIAM1 Expression. PLoS ONE 10(5): e0121175. <https://doi.org/10.1371/journal.pone.0121175> PMID: 25973950
2. Guo L., Bai H., Zou D. et al. The role of microRNA-133b and its target gene FSCN1 in gastric cancer. *J Exp Clin Cancer Res* 33, 99 (2014). <https://doi.org/10.1186/s13046-014-0099-0> PMID: 25433493
3. Guo L., Bai H., Zou D. et al. Correction to: The role of microRNA-133b and its target gene FSCN1 in gastric cancer. *J Exp Clin Cancer Res* 39, 220 (2020). <https://doi.org/10.1186/s13046-020-01716-6> PMID: 33081806
4. Chong Y, Zhang J, Guo X, Li G, Zhang S, et al. (2014) MicroRNA-503 Acts as a Tumor Suppressor in Osteosarcoma by Targeting L1CAM. PLoS ONE 9(12): e114585. <https://doi.org/10.1371/journal.pone.0114585> PMID: 25536034
5. The PLOS ONE Editors (2022) Retraction: MicroRNA-503 Acts as a Tumor Suppressor in Osteosarcoma by Targeting L1CAM. PLoS ONE 17(6): e0269900. <https://doi.org/10.1371/journal.pone.0269900> PMID: 35675270
6. Shen L, Wang P, Yang J, Li X (2014) MicroRNA-217 Regulates WASF3 Expression and Suppresses Tumor Growth and Metastasis in Osteosarcoma. PLoS ONE 9(10): e109138. <https://doi.org/10.1371/journal.pone.0109138> PMID: 25289936
7. The PLOS ONE Editors (2022) Retraction: MicroRNA-217 Regulates WASF3 Expression and Suppresses Tumor Growth and Metastasis in Osteosarcoma. PLoS ONE 17(6): e0269901. <https://doi.org/10.1371/journal.pone.0269901> PMID: 35675266
8. Niu G, Li B, Sun L, An C (2015) MicroRNA153 Inhibits Osteosarcoma Cells Proliferation and Invasion by Targeting TGF- $\beta$ 2. PLoS ONE 10(3): e0119225. <https://doi.org/10.1371/journal.pone.0119225> PMID: 25793604
9. The PLOS ONE Editors (2022) Retraction: MicroRNA-153 Inhibits Osteosarcoma Cells Proliferation and Invasion by Targeting TGF- $\beta$ 2. PLoS ONE 17(6): e0269902. <https://doi.org/10.1371/journal.pone.0269902>
10. Jiang G., Cui Y., Yu X., Wu Z., Ding G., Cao L. miR-211 suppresses hepatocellular carcinoma by down-regulating SATB2. *Oncotarget*. 2015; 6: 9457–9466. Retrieved from <https://www.oncotarget.com/article/3265/text/> <https://doi.org/10.18632/oncotarget.3265> PMID: 25888635

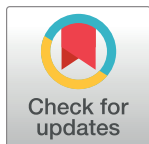

## OPEN ACCESS

**Citation:** The PLOS ONE Editors (2023) Retraction: The Downregulation of MiR-182 Is Associated with the Growth and Invasion of Osteosarcoma Cells through the Regulation of TIAM1 Expression. PLoS ONE 18(4): e0283115. <https://doi.org/10.1371/journal.pone.0283115>

**Published:** April 21, 2023

**Copyright:** © 2023 The PLOS ONE Editors. This is an open access article distributed under the terms of the [Creative Commons Attribution License](https://creativecommons.org/licenses/by/4.0/), which permits unrestricted use, distribution, and reproduction in any medium, provided the original author and source are credited.
